# Supplementary material for: OmiGA: A Toolkit for Ultra-efficient Molecular Trait Analysis in Complex Populations
Source: Research Square preprint supplement (doi:10.21203/rs.3.rs-5885802/v1), 2025-02-17
Supplement: Supplementary file 1 [file e9c058eabfe9f6c5e1c8fee3.docx]

# Supplementary Figures and legends


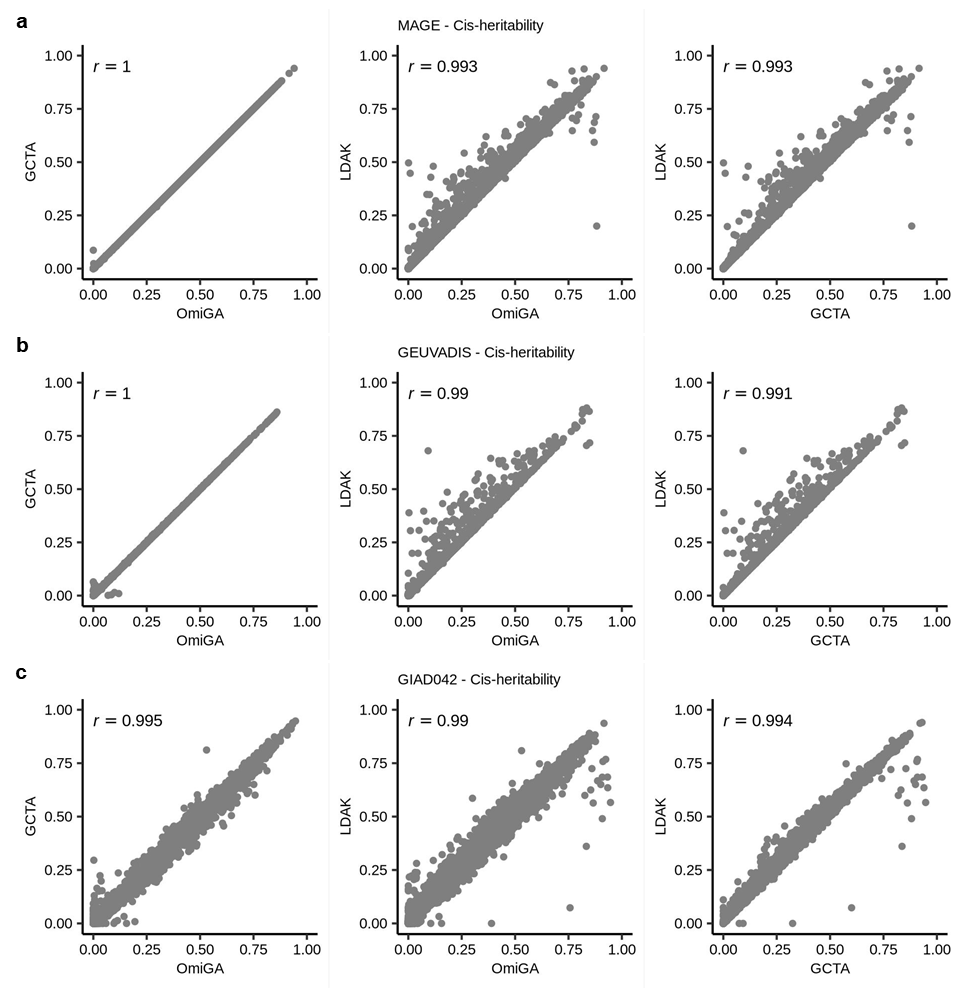


**Supplementary Figure 1 |** **Correlations between *cis*-heritability estimates computed from OmiGA, GCTA v1.94.1, and LDAK v6 in different datasets.** We retained only the *cis*-heritability results with converged estimates in both tools for each panel. The labels (*r*) in the panels represent the Pearson’s correlation.


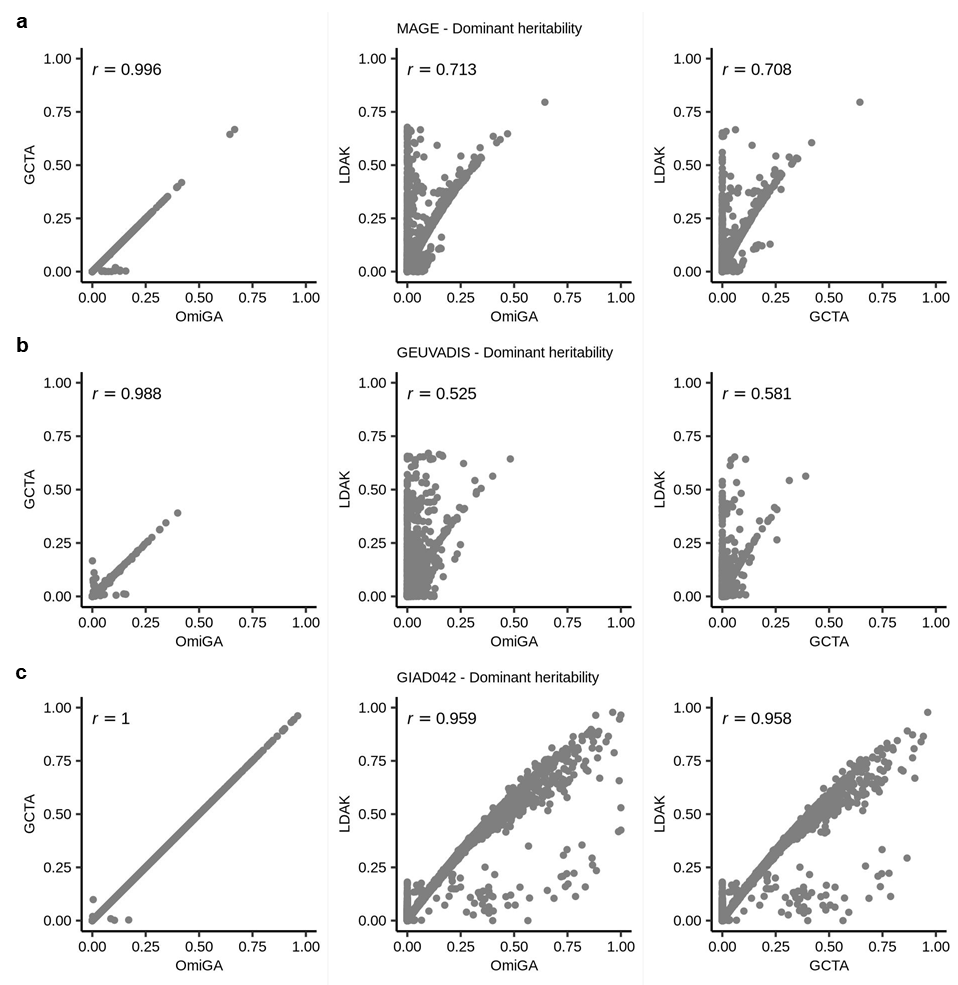


**Supplementary Figure 2 |** **Correlations between dominant heritability estimates computed from OmiGA, GCTA v1.94.1, and LDAK v6 in different datasets.** We retained only the dominant heritability results with converged estimates in both tools for each panel. The labels (*r*) in the panels represent the Pearson’s correlation.


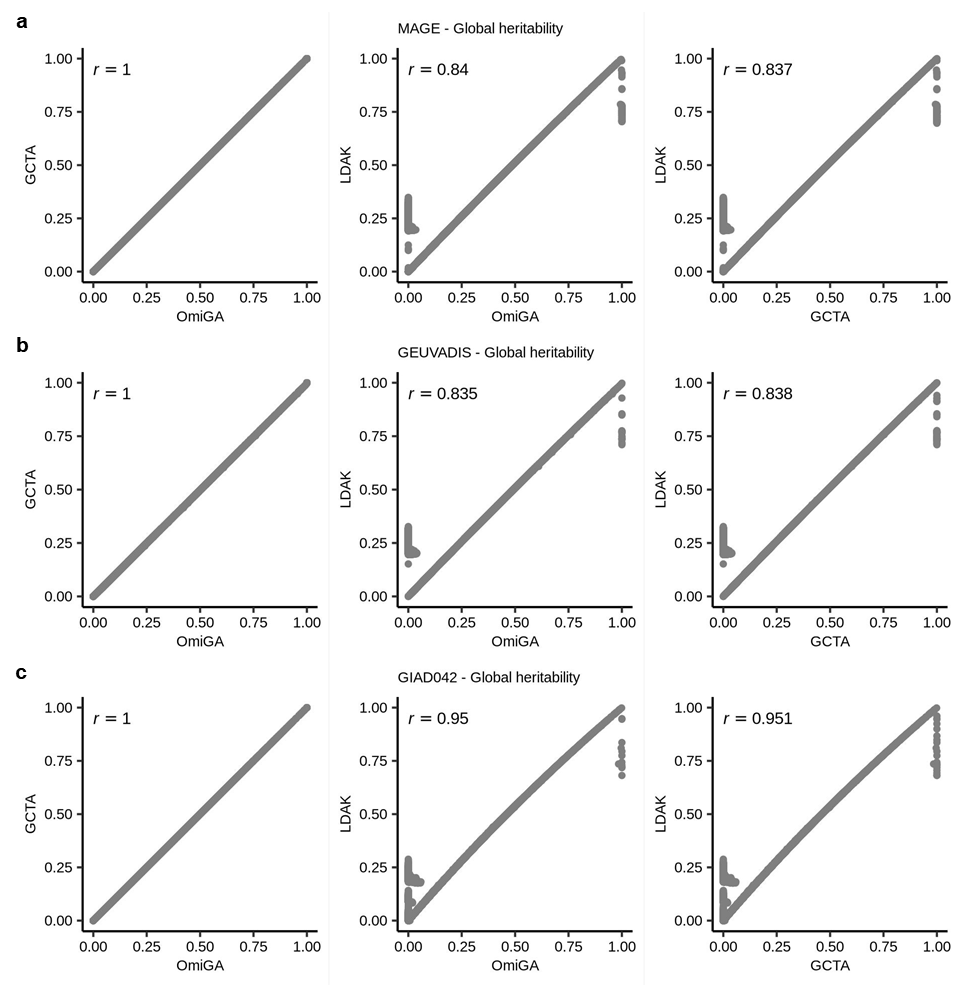


**Supplementary Figure 3 |** **Correlations between global additive heritability estimates computed from OmiGA, GCTA v1.94.1, and LDAK v6 in different datasets.** We retained only the heritability results with converged estimates in both tools for each panel. The labels (*r*) in the panels represent the Pearson’s correlation.


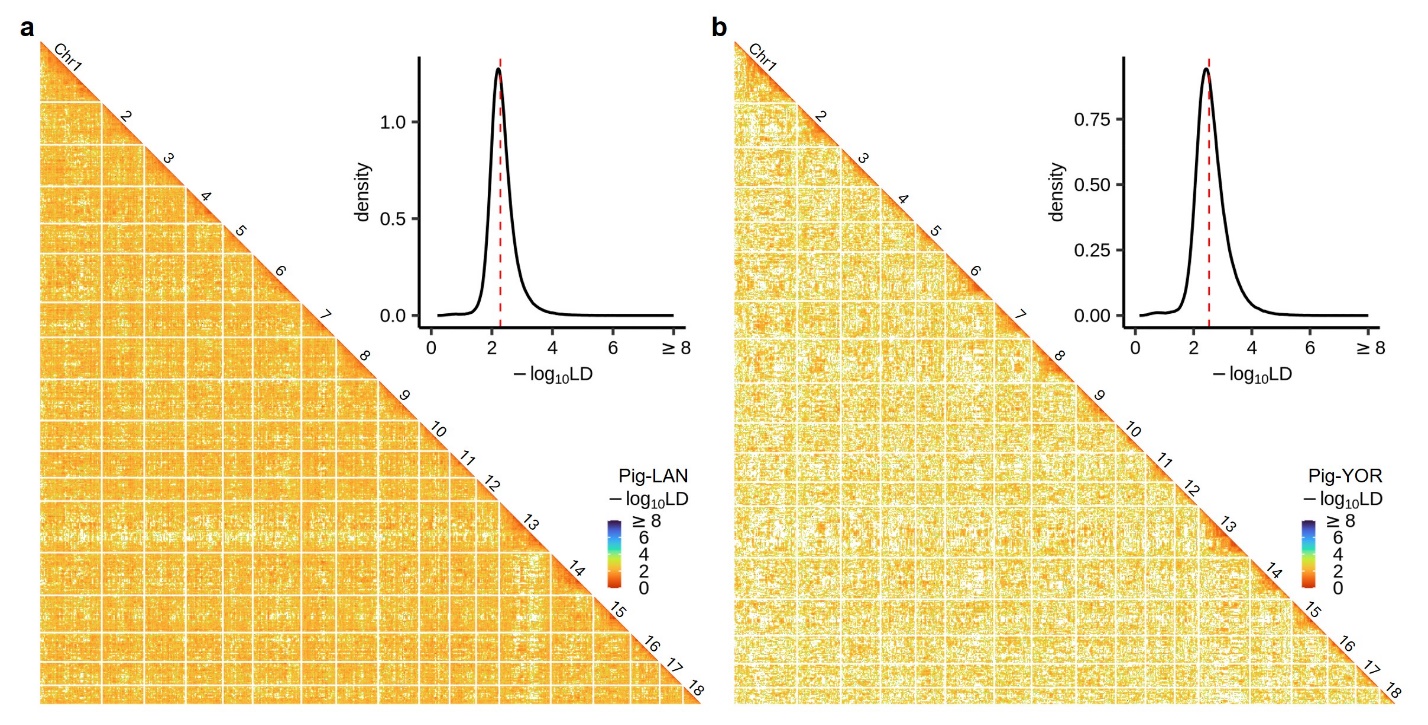


**Supplementary Figure 4 |** **Linkage disequilibrium (LD) of sub-populations from GIAD042.** Log10-scaled linkage disequilibrium (LD) and their distribution across the whole-genome variants for Landrace (LAN) sub-population (**a**) and Yorkshire (YOR) sub-population (**b**) of GIAD042 dataset. We estimated the global LD using GEAR (https://github.com/gc5k/gear2)1. The white lines in the heatmap splitted the different chromosomes. The red dotted lines in the density plot represent median values.


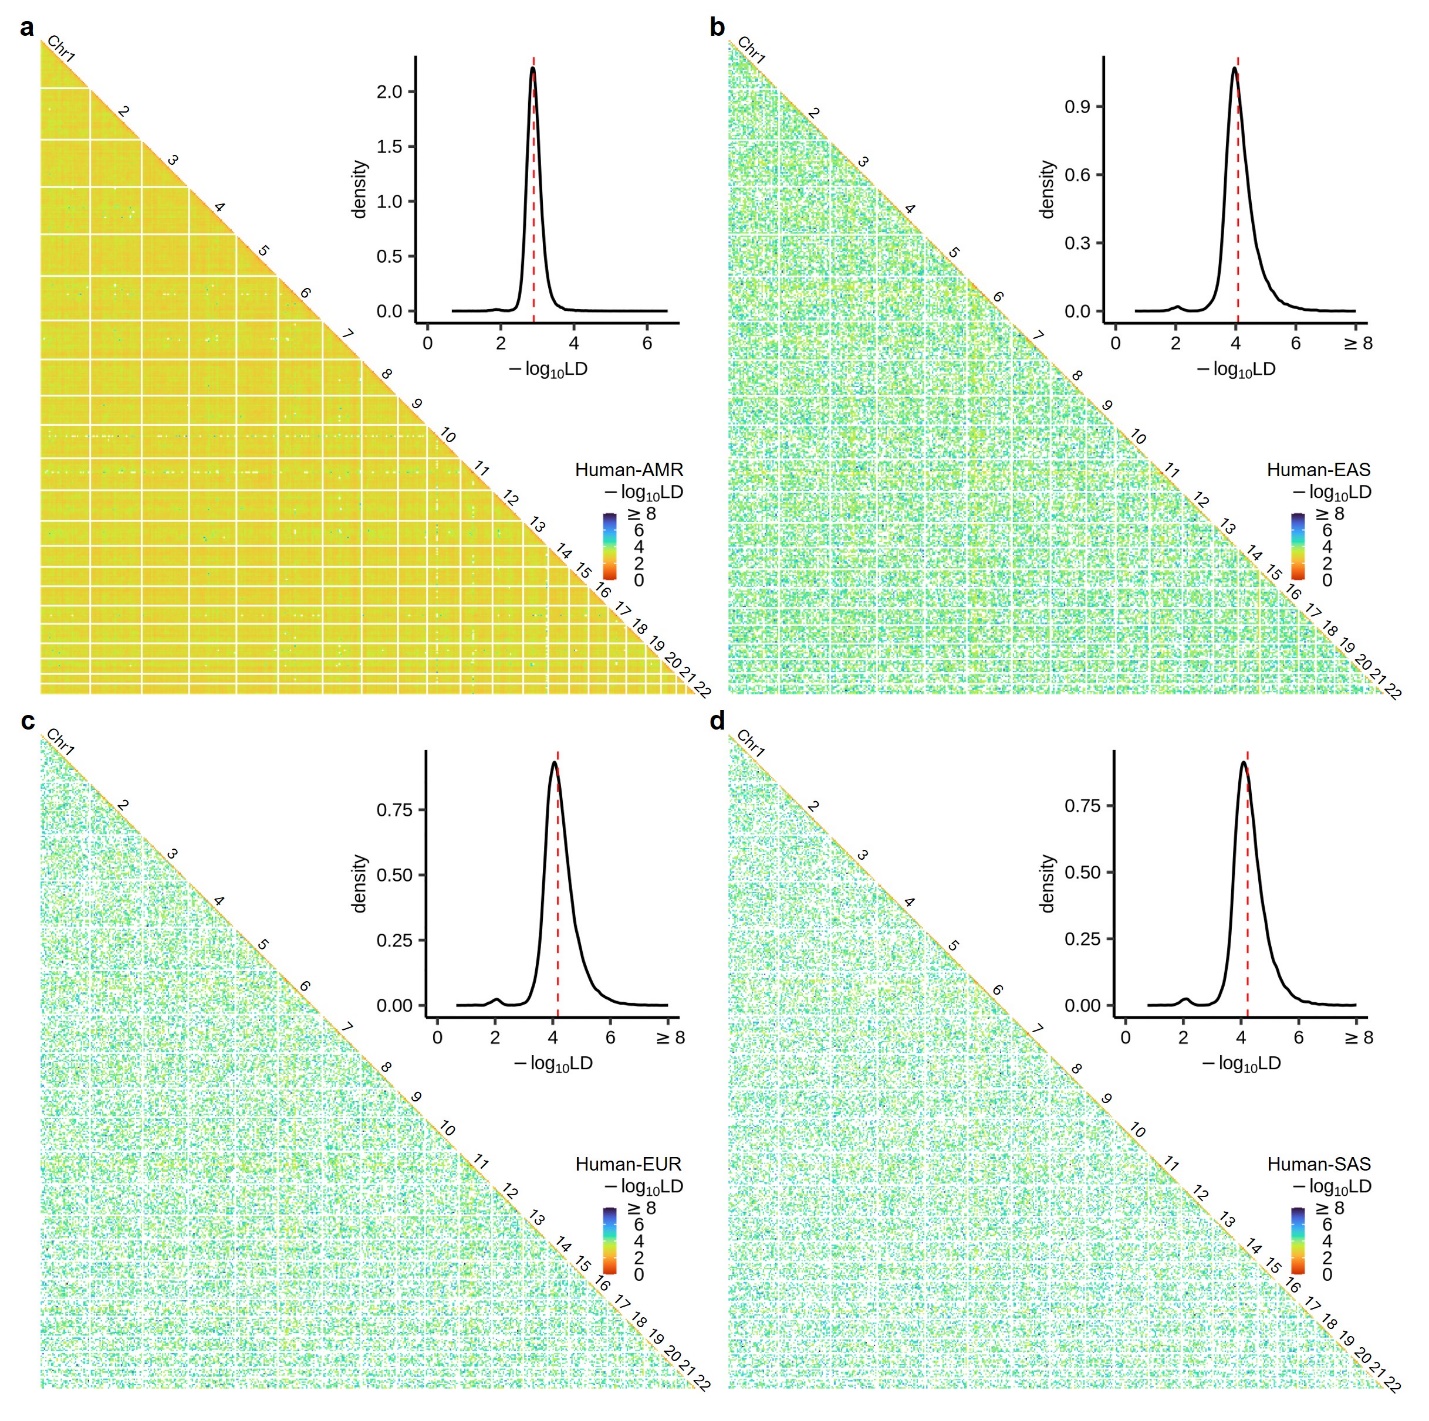


**Supplementary Figure 5 |** **Linkage disequilibrium (LD) of sub-populations from MAGE.** Log10-scaled linkage disequilibrium (LD) and their distribution across the whole-genome variants for AMR sub-population (**a**), EAS sub-population (**b**), EUR sub-population (**c**), and SAS sub-population (**d**) of MAGE dataset. We estimated the global LD using GEAR (https://github.com/gc5k/gear2). The white lines in the heatmap splitted the different chromosomes. The red dotted lines in the density plot represent median values.


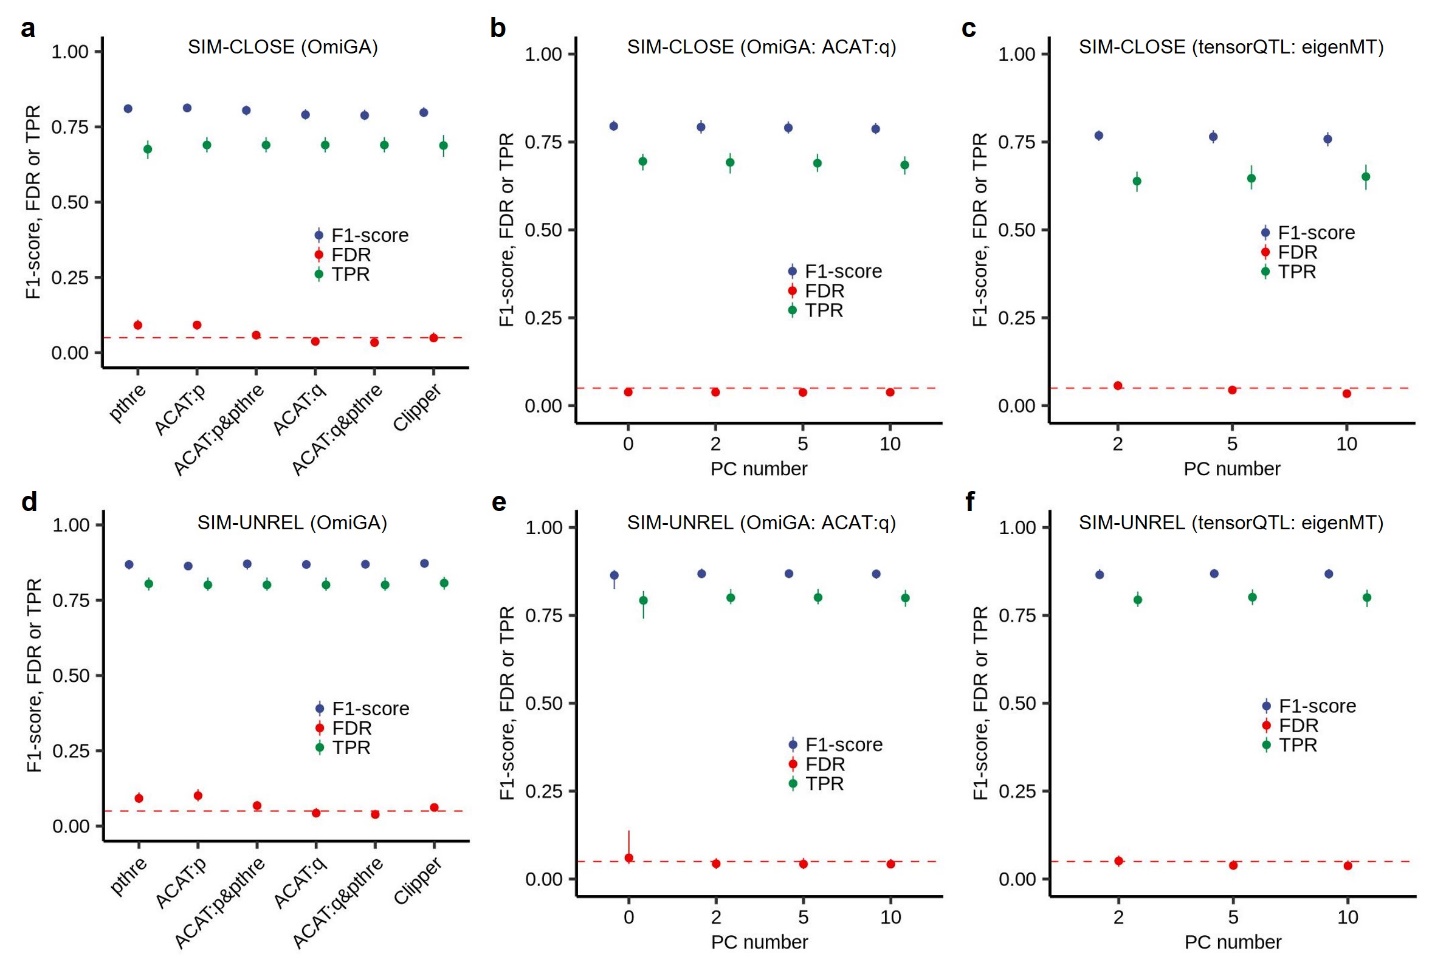


**Supplementary Figure 6 | Comparison of multiple-testing approaches and the number of genotype principal component (PC) for interaction *cis*-eQTL (*cis*-ieQTL) mapping. a,** *Cis*-ieQTL mapping using OmiGA in the SIM-CLOSE. pthre: the nominal *P*-values of lead variants below the variant-level threshold obtained from permutations. ACAT:p: the gene-level *P*-values obtained from ACAT < 0.05. ACAT:p&pthre: the combinations of ACAT:p and pthre. ACAT:q: the Benjamini & Hochberg (BH) adjusted gene-level *P*-values obtained from ACAT < 0.05. ACAT:q&pthre: the combinations of ACAT:q and pthre. Clipper: the gene-level *P*-values obtained from ClipperQTL < 0.05. **b,** *Cis*-eQTL mapping using OmiGA with ACAT:q in the SIM-CLOSE. **c,** *Cis*-ieQTL mapping using tensorQTL with eigenMT in the SIM-CLOSE. **d,** *Cis*-ieQTL mapping using OmiGA in the SIM-UNREL. **e,** *Cis*-ieQTL mapping using OmiGA with ACAT:q in the SIM-UNREL. **f,** *Cis*-ieQTL mapping using tensorQTL with eigenMT in the SIM-UNREL. The points and the error bars represent the mean and the range, respectively, in all panels.


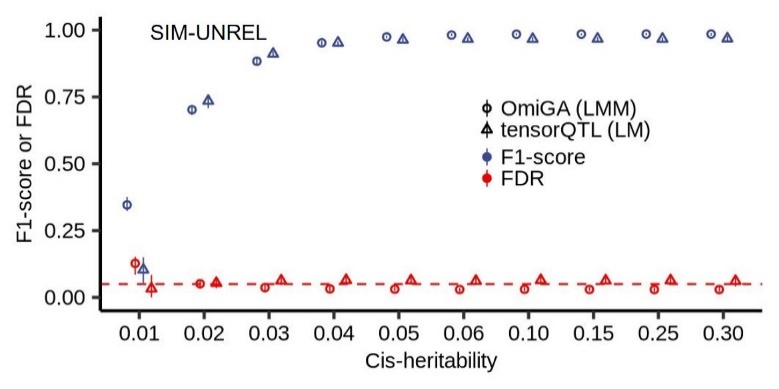


**Supplementary Figure 7 | F1-score and FDR of eGene discovery for gene with different *cis*-heritability using LMM-based OmiGA and LM-based tensorQTL in the SIM-UNREL.** The points and the error bars represent the mean and the range, respectively.


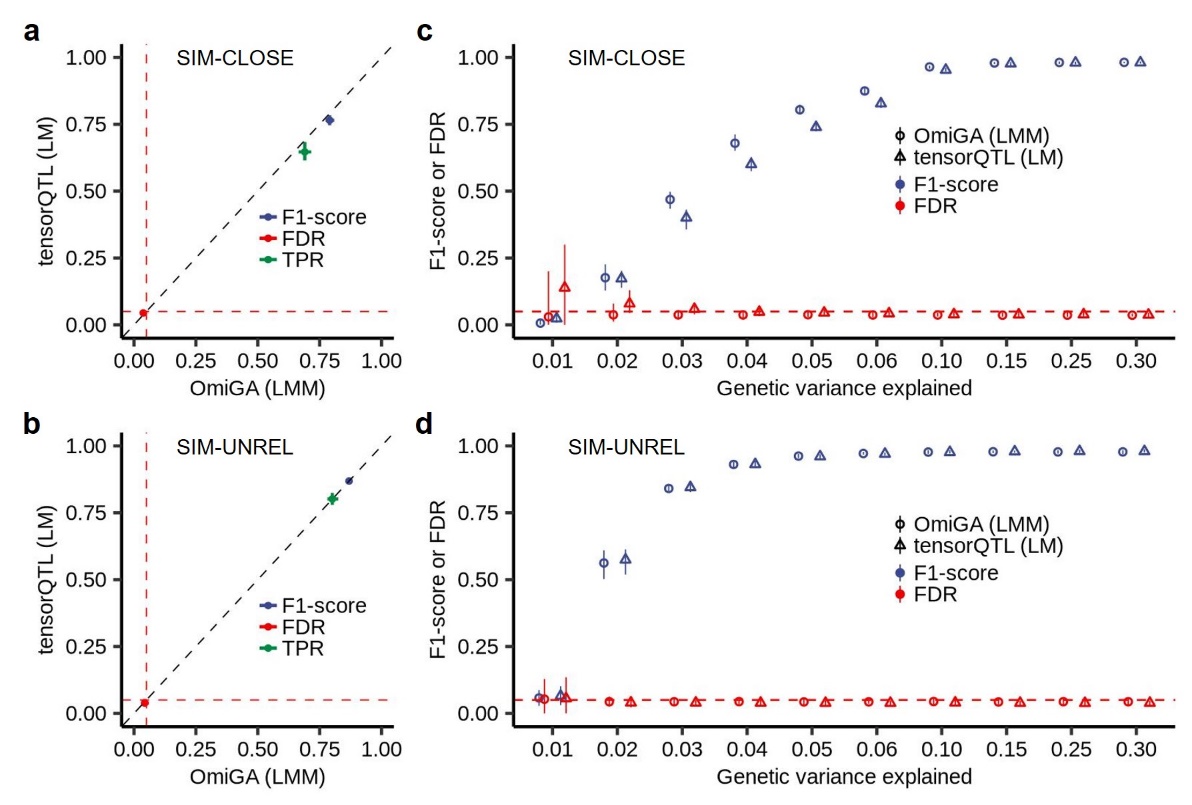


**Supplementary Figure 8 | Comparison of simulated ieGenes discovered by OmiGA and tensorQTL. a,b,** F1-score and FDR of ieGene discovery for gene with different genetic variance explained by *cis*-variants using linear mixed model (LMM) of OmiGA and linear model (LM) in the SIM-CLOSE (**a**) and the SIM-UNREL (**b**). **c,d,** F1-score, FDR, and TPR of *cis*-ieQTL mapping to identify ieGene using LMM of OmiGA and LM of tensorQTL in the SIM-CLOSE (**c**) and SIM-UNREL (**d**).


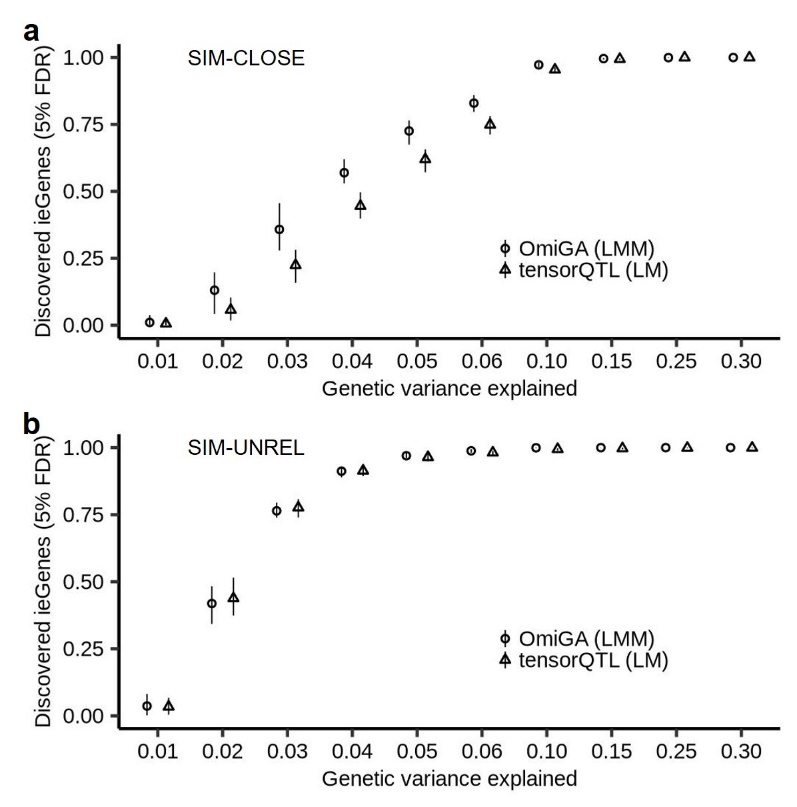


**Supplementary Figure 9 | Proportion of simulated ieGenes discovered by OmiGA and tensorQTL. a,b,** For the *cis*-ieQTL mapping results from the SIM-CLOSE (**a**) and the SIM-UNREL (**b**), we sorted the genes by the *P*-values at gene-level and summarized the proportion of ieGenes discovered at 5% false discovery rate. The point and error bar represent the median and quantile, respectively.


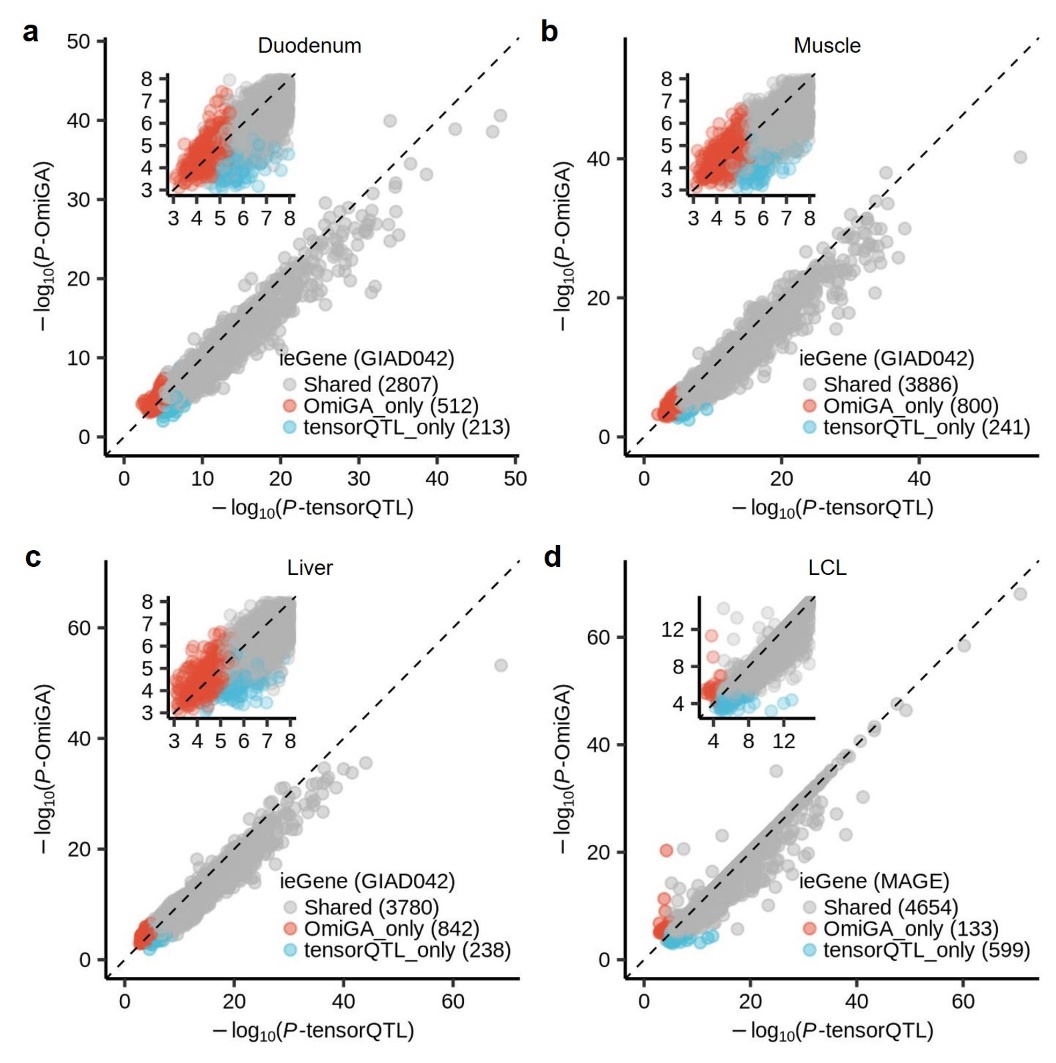


**Supplementary Figure 10 | Comparison of ieGenes discovered by OmiGA and tensorQTL. a-c,** -log10-scaled *P*-values of lead *cis*-ieQTLs detected in muscle (**a**), liver (**b**), and duodenum (**c**) from GIAD042 dataset and LCL from MAGE (**d**) dataset.

# Supplementary Tables

**Table S1 | The number of casual variants within *cis*-region and sampled probability for simulating gene expression levels**

| Type | # of casual variants | Probability |
| --- | --- | --- |
| non-eGene | 0 | 0.35483532 |
| eGene | 1 | 0.34962617 |
| eGene | 2 | 0.18326554 |
| eGene | 3 | 0.07072812 |
| eGene | 4 | 0.02498728 |
| eGene | 5 | 0.01655758 |

**Table S2 | The number of casual variants within *cis*-region and sampled probability for simulating gene expression levels with ancestry interaction eQTL effects**

| Type | # of casual variants | Probability |
| --- | --- | --- |
| non-ieGene | 0 | 0.55483532 |
| ieGene | 1 | 0.24962617 |
| ieGene | 2 | 0.13326554 |
| ieGene | 3 | 0.04072812 |
| ieGene | 4 | 0.01498728 |
| ieGene | 5 | 0.00655758 |

# References

1. Zhu, T.-N. *et al.* An Atlas of Linkage Disequilibrium Across Species. Preprint at https://doi.org/10.1101/2024.09.24.614726 (2024).
